# Supplementary material for: Temporal tracking of microglial and monocyte single-cell transcriptomics in lethal flavivirus infection
Source: PubMed Central journal article supplement (PMC10074823; doi:10.1186/s40478-023-01547-4), 2023-04-04
Supplement: 40478_2023_1547_MOESM10_ESM.pdf [file 40478_2023_1547_MOESM10_ESM.pdf]

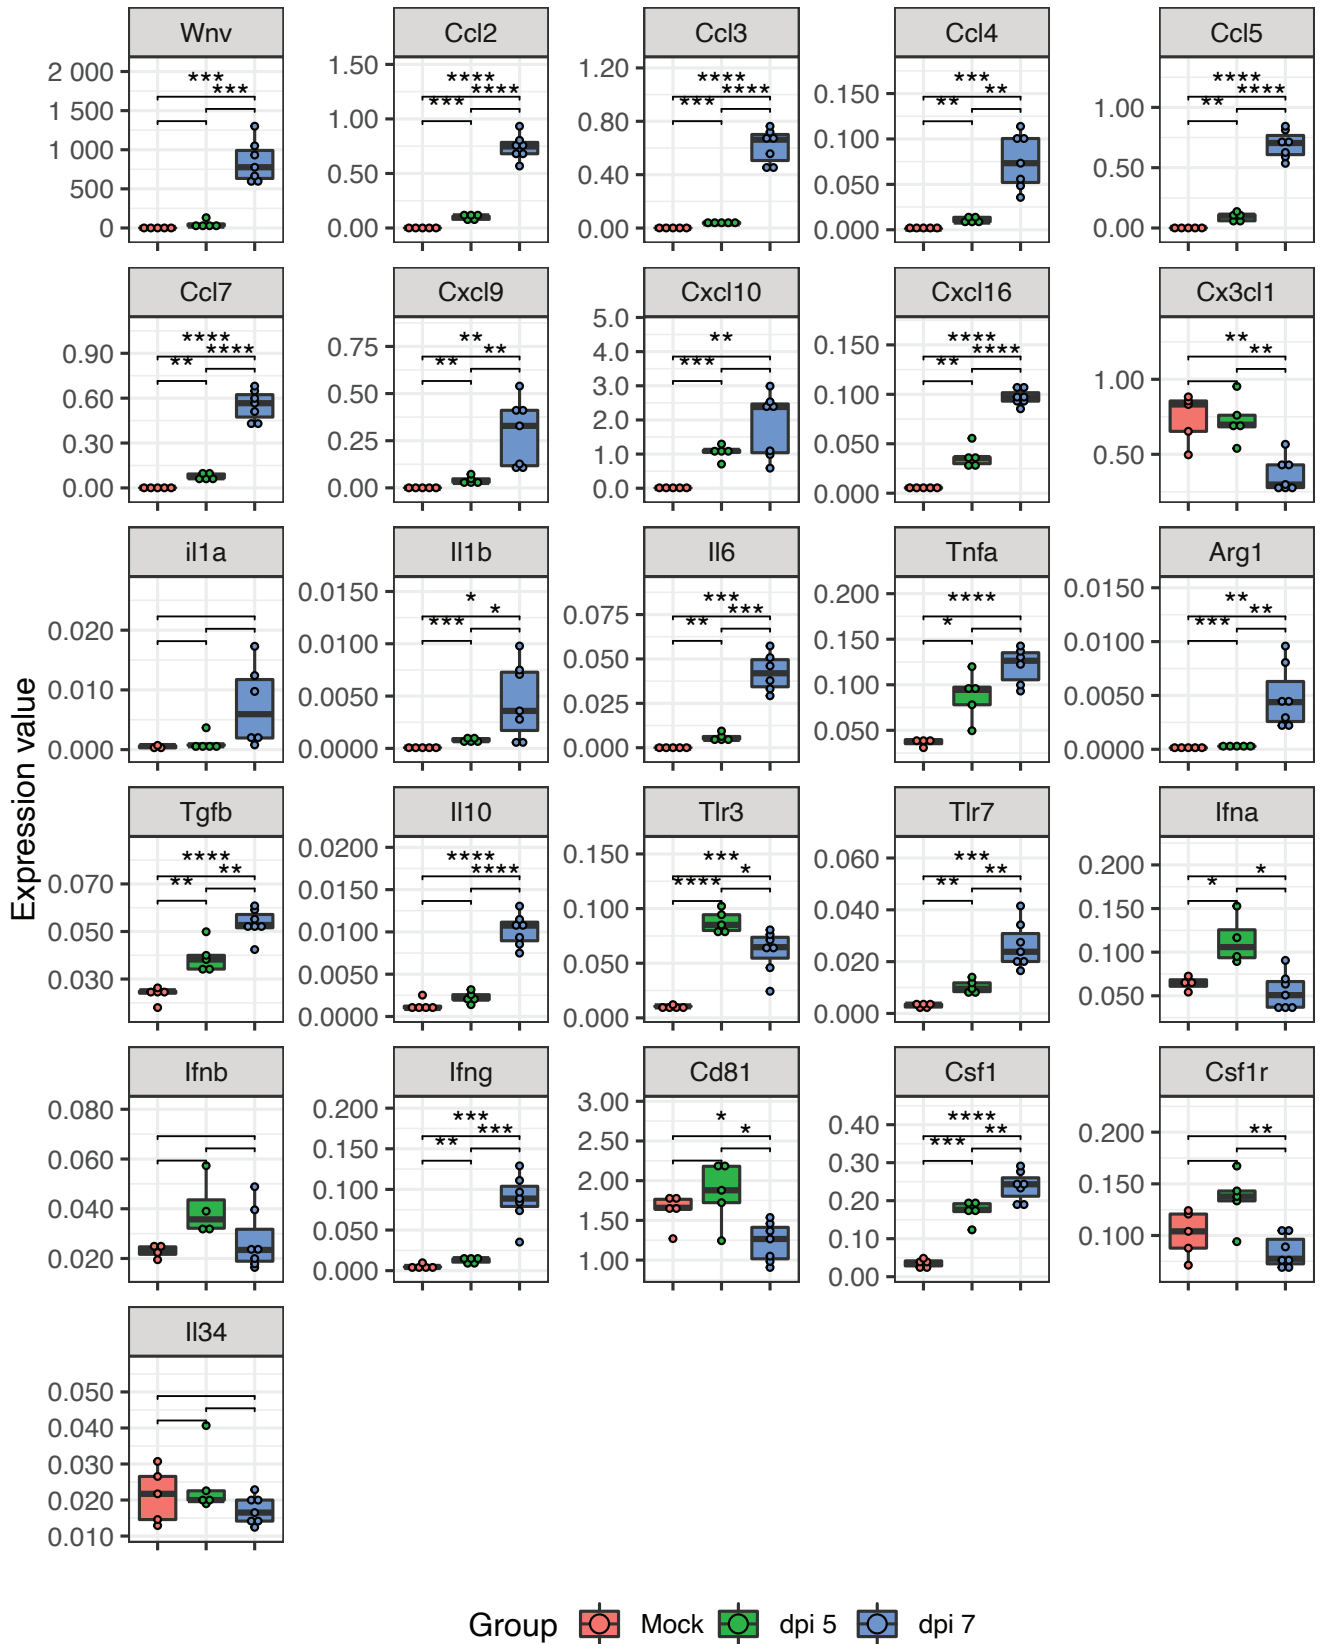

a

Mock-infected

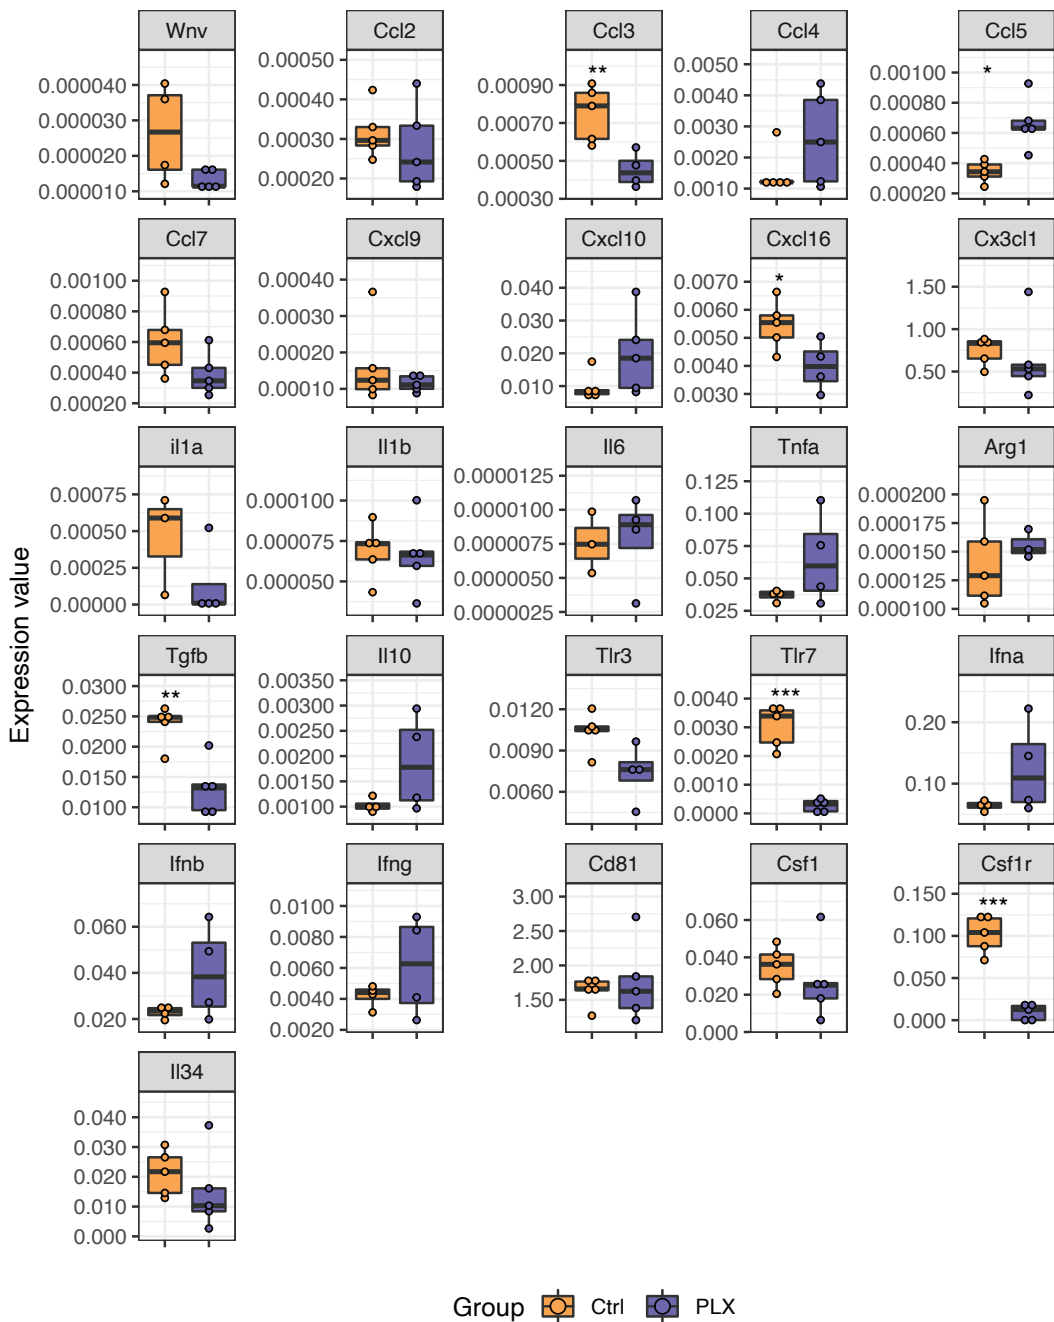

b

dpi 5

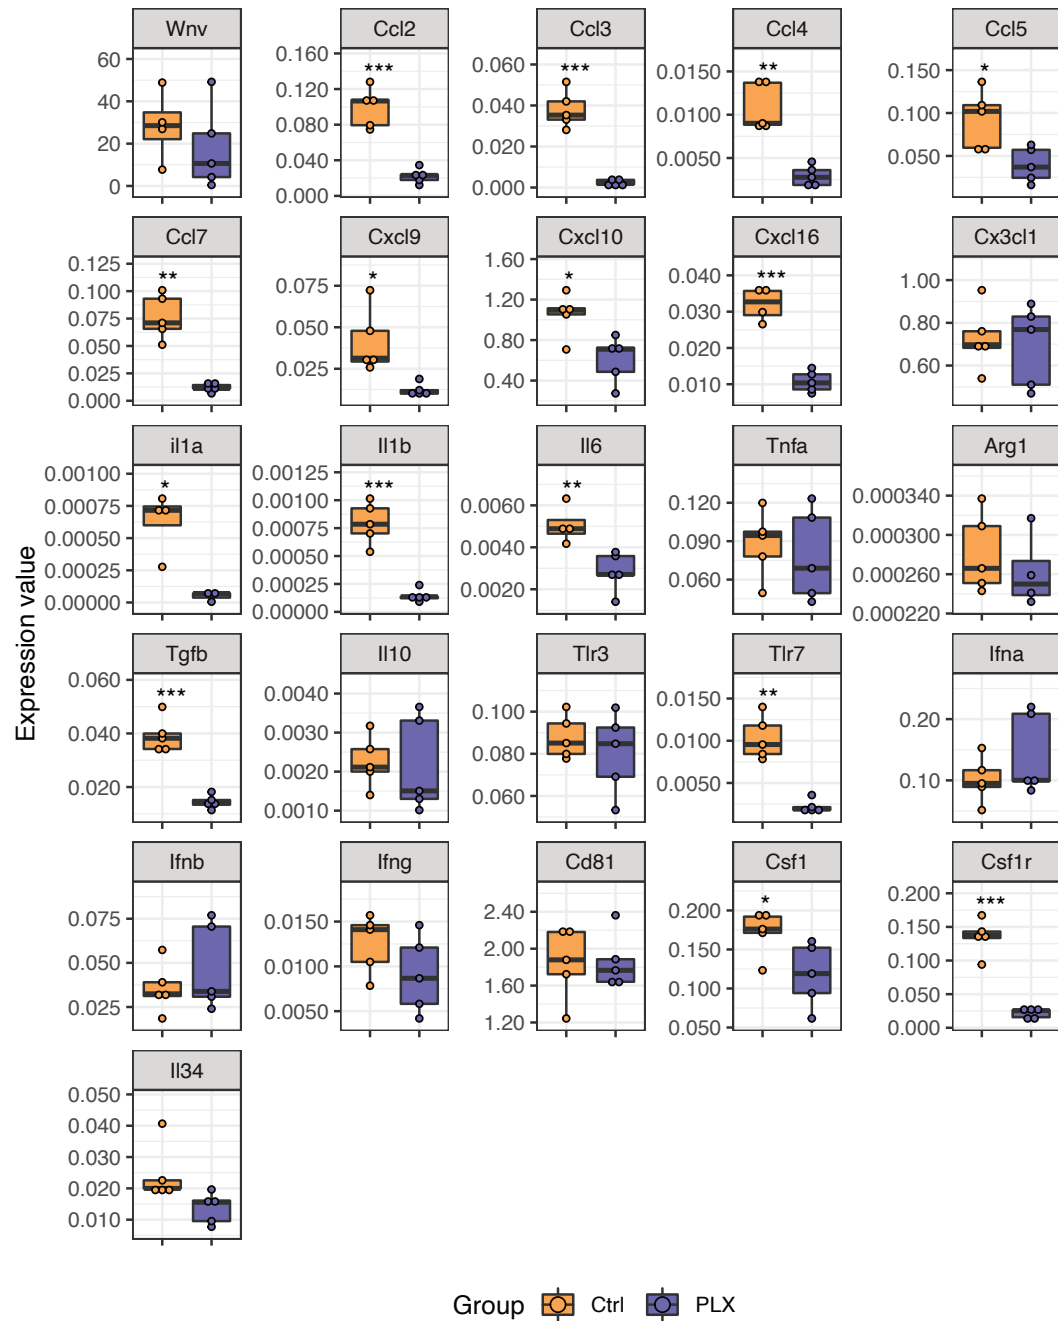

a

dpi 7 - PLX5622 vs Ctrl

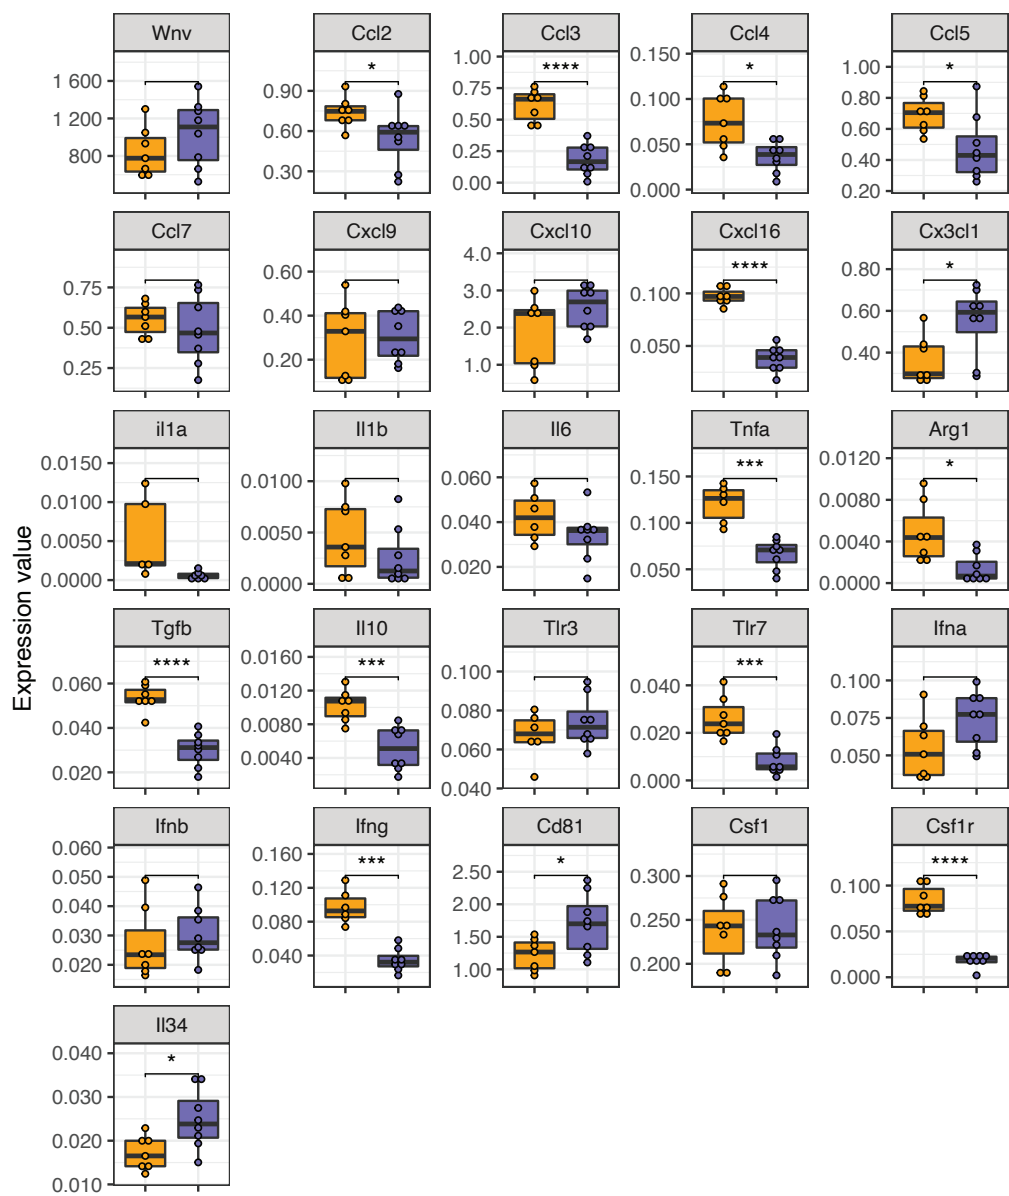Group  Ctrl  PLX

b

dpi 7 - Anti-Ly6C vs Isotype Ctrl

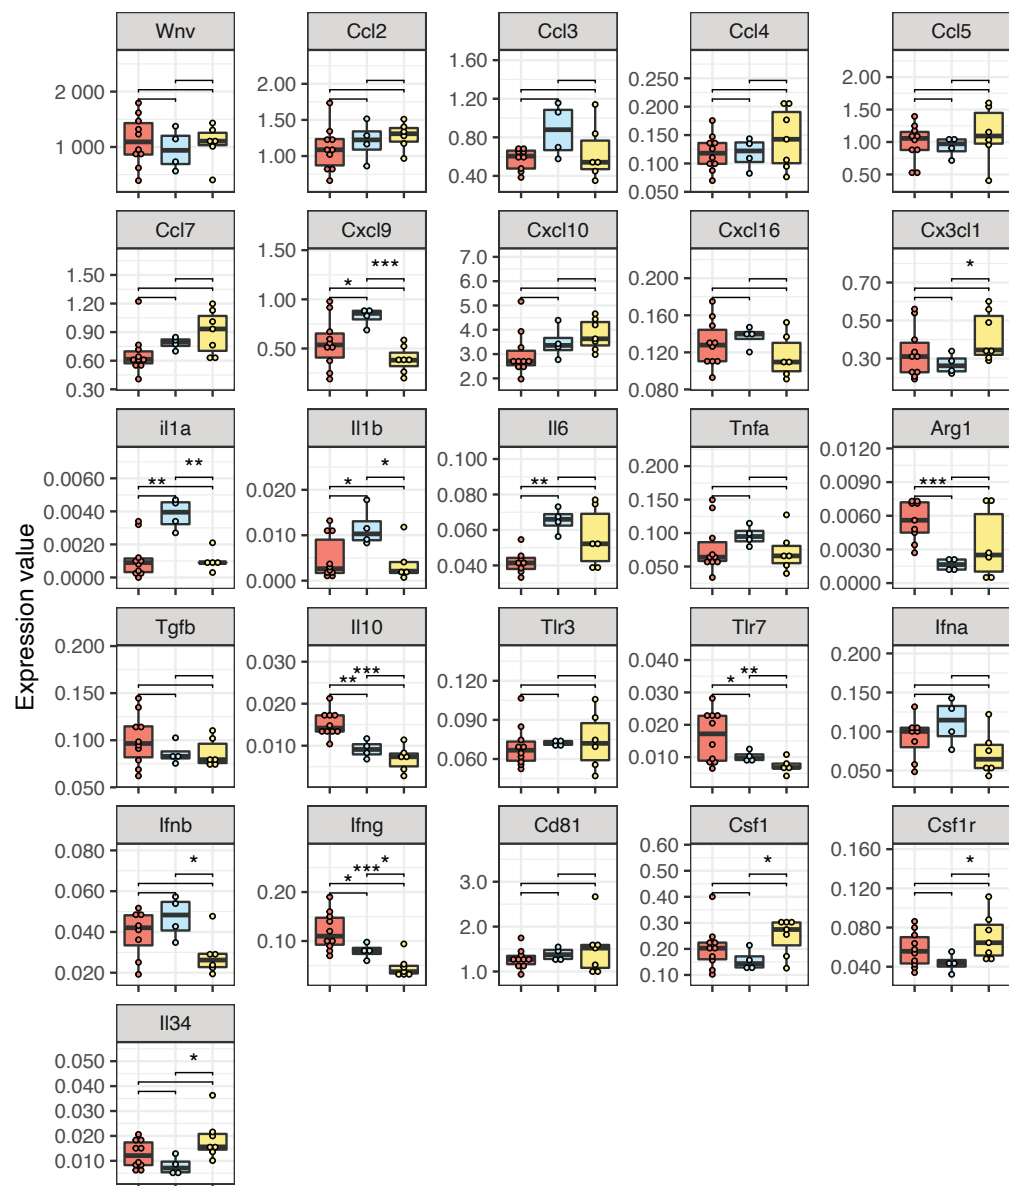Group  Isotype dpi 5-6  Anti-Ly6C dpi 5-6 100ug  Anti-Ly6C dpi 5-6 200ug
