# Supplementary material for: Temporal tracking of microglial and monocyte single-cell transcriptomics in lethal flavivirus infection
Source: PubMed Central journal article supplement (PMC10074823; doi:10.1186/s40478-023-01547-4), 2023-04-04

Spleen T cell proliferation

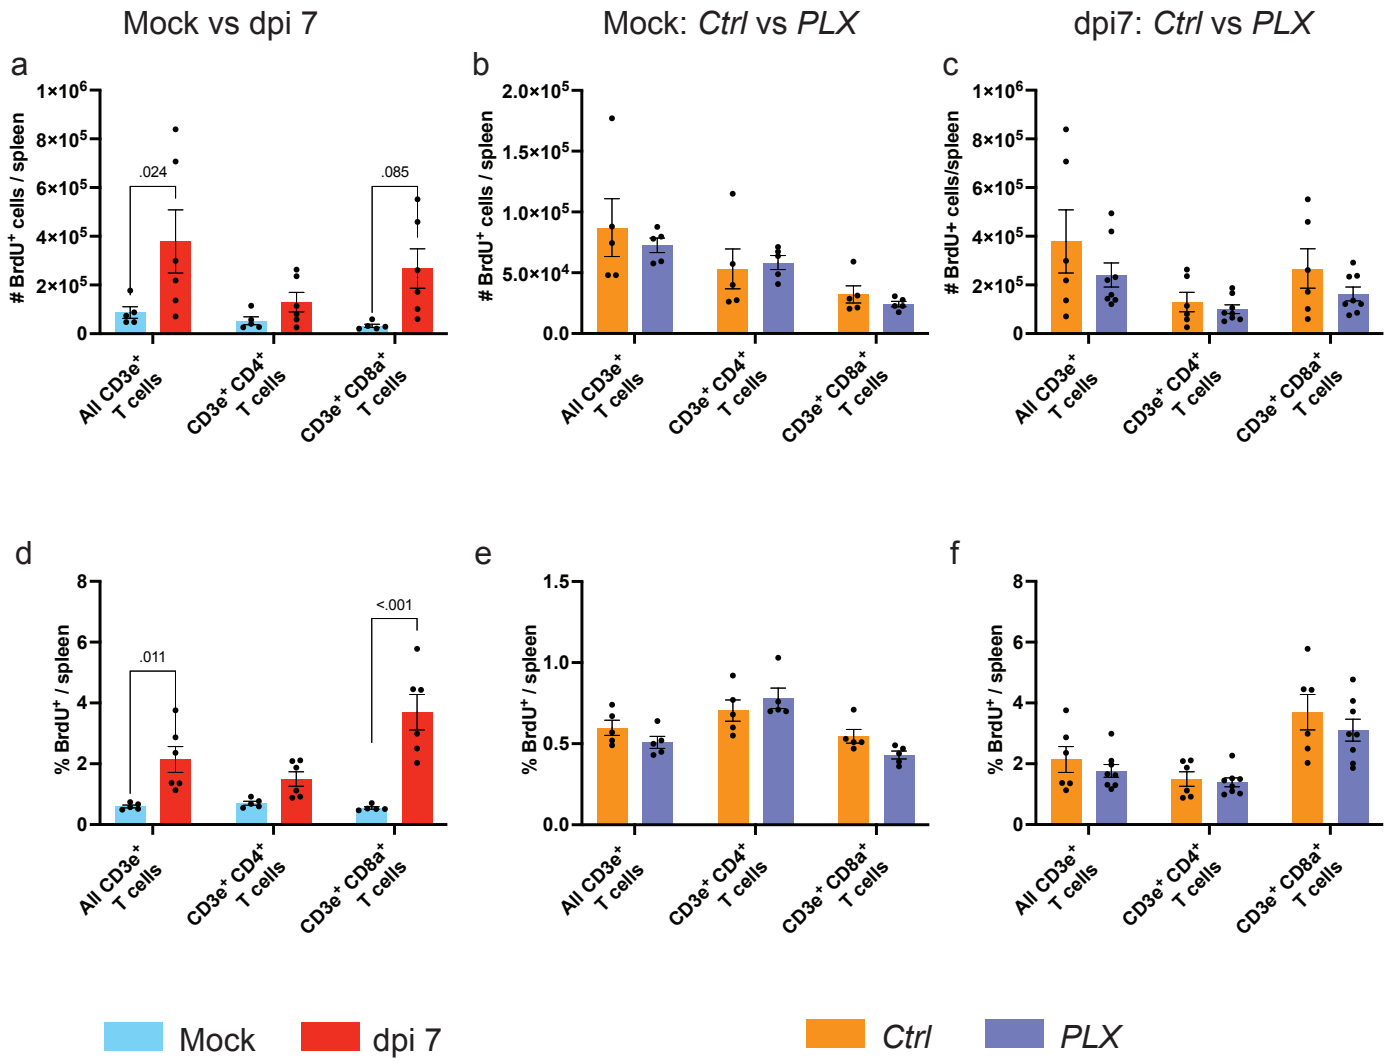

Supplement: 40478_2023_1547_MOESM11_ESM.pdf [file 40478_2023_1547_MOESM11_ESM.pdf]
