# Supplementary material for: Temporal tracking of microglial and monocyte single-cell transcriptomics in lethal flavivirus infection
Source: PubMed Central journal article supplement (PMC10074823; doi:10.1186/s40478-023-01547-4), 2023-04-04
Supplement: 40478_2023_1547_MOESM12_ESM.pdf [file 40478_2023_1547_MOESM12_ESM.pdf]

a Disease score @ dpi 7

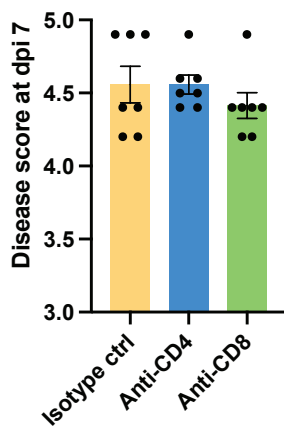

b % weight loss @ dpi 7

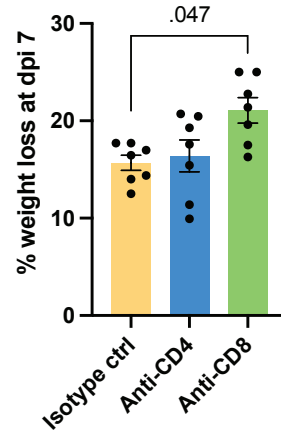

c *Ifn-γ*

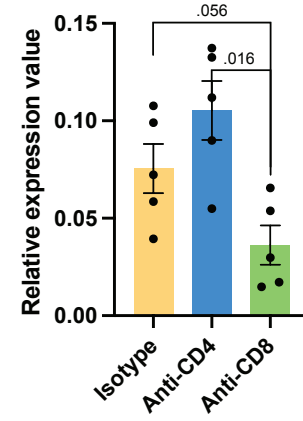

d Anti-CD4

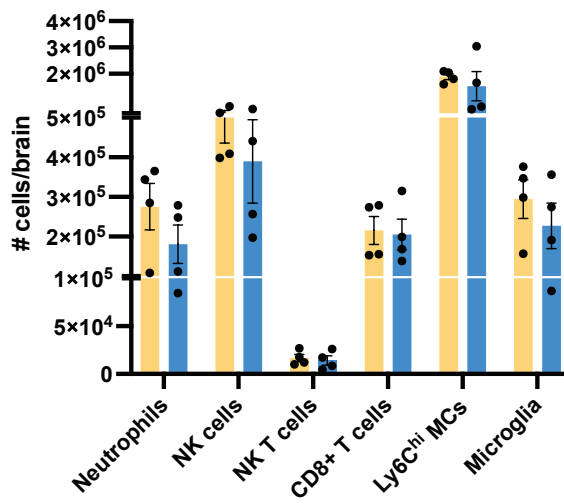

e Anti-CD8

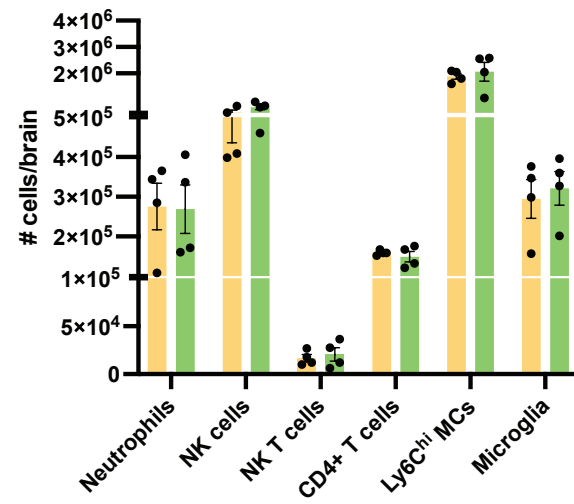

Isotype ctrl

Anti-CD4

Anti-CD8
