# Supplementary material for: Temporal tracking of microglial and monocyte single-cell transcriptomics in lethal flavivirus infection
Source: PubMed Central journal article supplement (PMC10074823; doi:10.1186/s40478-023-01547-4), 2023-04-04
Supplement: 40478_2023_1547_MOESM13_ESM.pdf [file 40478_2023_1547_MOESM13_ESM.pdf]

**a** # CD8<sup>+</sup> T cells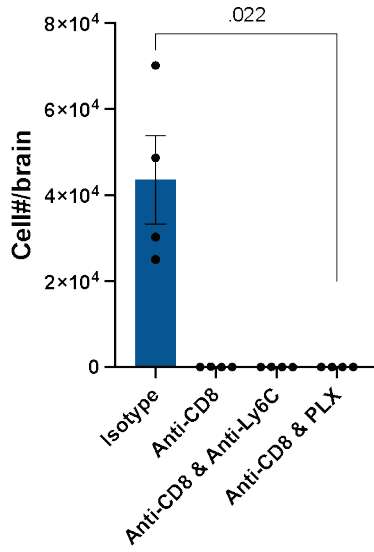**b** # Ly6C<sup>hi</sup> MCs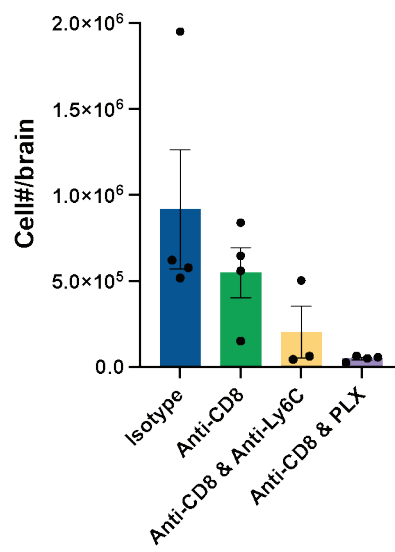**c** # Microglia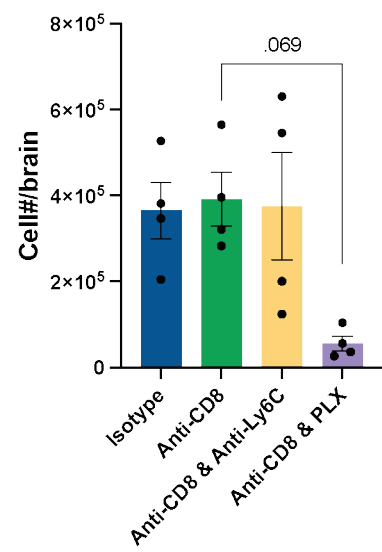**d** % weight loss at dpi 6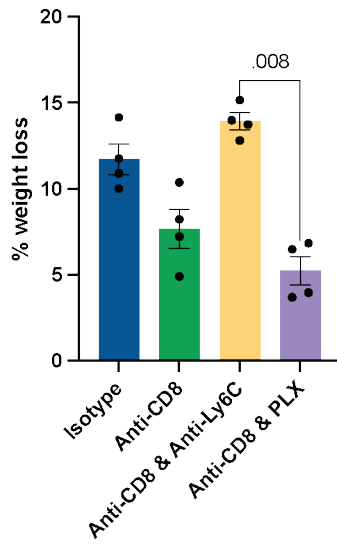**e** *Wnv*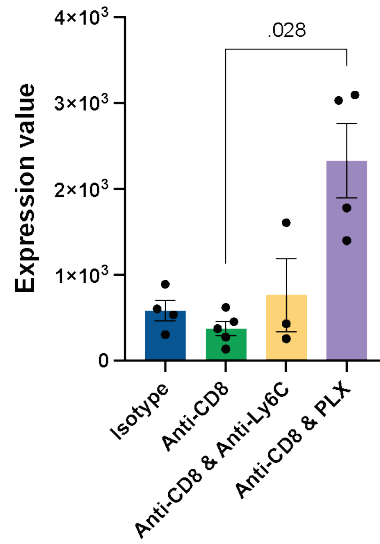**f** Plaque assay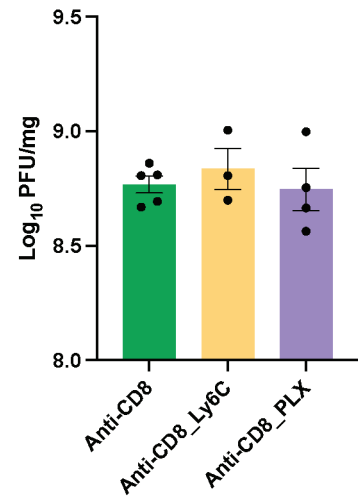

■ Isotype    ■ Anti-CD8    ■ Anti-CD8 & Anti-Ly6C    ■ Anti-CD8 & PLX
